# Supplementary material
Source: publisher figshare collection journal article supplement (https://springernature.figshare.com/articles/dataset/_/7471310)
Supplement: Supplementary file [file 13837385]

**Table S2: Tissue samples used in this study**

| Source | Patient #  | Region | Type | Age at Onset | Age at Death | Sex | Race | PMI (hours) | RT-qPCR | Western | RIN | Notes / Cause of Death                      |
|--------|------------|--------|------|--------------|--------------|-----|------|-------------|---------|---------|-----|---------------------------------------------|
| JHU    | 13         | MOTOR  | ALS  | ~61          | 71           | M   | W    | ?           | Y       |         | N/A |                                             |
|        | OCCIPITAL  | Y      |      |              |              |     |      |             |         | 8       |     |                                             |
|        | HIPPO      | Y      |      |              |              |     |      |             |         | 3.3     |     |                                             |
| UCSD   | 19         | MOTOR  | CTRL | N/A          | 80           | F   | W    | 2.5         | Y       |         | 5.3 | Parkinson's disease                         |
|        | CEREBELLUM | Y      |      |              |              |     |      |             | Y       | 5.5     |     |                                             |
| UCSD   | 23         | MOTOR  | CTRL | N/A          | 77           | M   | W    | 6           | Y       | Y       | 9.2 | Cardiac failure                             |
|        | CEREBELLUM | Y      |      |              |              |     |      |             | Y       | 6       |     |                                             |
| UCSD   | 26         | MOTOR  | CTRL | N/A          | 49           | M   | W    | 4           | Y       | Y       | 8.9 | Cancer / Obesity                            |
|        | CEREBELLUM | Y      |      |              |              |     |      |             | Y       | 7.7     |     |                                             |
| JHU    | 30         | MOTOR  | ALS  | 28           | 44           | M   | W    | 26.5        | Y       |         | 5.1 |                                             |
|        | OCCIPITAL  | Y      |      |              |              |     |      |             |         | 5.3     |     |                                             |
|        | HIPPO      | Y      |      |              |              |     |      |             |         | 4.4     |     |                                             |
| UCSD   | 31         | MOTOR  | CTRL | N/A          | 67           | M   | W    | 3.5         | Y       | Y       | 9.4 | Lung cancer                                 |
|        | CEREBELLUM | Y      |      |              |              |     |      |             | Y       | 7.7     |     |                                             |
| UCSD   | 32         | MOTOR  | ALS  | 69.5         | 71           | M   | W    | 4.5         | Y       | Y       | 7.1 |                                             |
|        | CEREBELLUM | Y      |      |              |              |     |      |             | Y       | 3       |     |                                             |
| UCSD   | 33         | MOTOR  | ALS  | 47.5         | 54           | M   | W    | 5           | Y       | Y       | 7.9 |                                             |
|        | CEREBELLUM | Y      |      |              |              |     |      |             | Y       | 5.2     |     |                                             |
| JHU    | 33         | MOTOR  | ALS  | 63           | 65           | M   | W    | 15.5        | Y       |         | N/A |                                             |
|        | OCCIPITAL  | Y      |      |              |              |     |      |             |         | 2.7     |     |                                             |
|        | HIPPO      | Y      |      |              |              |     |      |             | Y       | 2.3     |     |                                             |
|        | FRONTAL    |        |      |              |              |     |      |             | Y       | N/A     |     |                                             |
| UCSD   | 35         | MOTOR  | ALS  | 68.25        | 74           | F   | W    | 5           | Y       | Y       | 9.9 |                                             |
|        | CEREBELLUM | Y      |      |              |              |     |      |             | Y       | 8       |     |                                             |
| UCSD   | 36         | MOTOR  | ALS  | 72           | 73           | M   | W    | 5           | Y       | Y       | 9.3 |                                             |
|        | CEREBELLUM | Y      |      |              |              |     |      |             | Y       | 5.6     |     |                                             |
| UCSD   | 39         | MOTOR  | CTRL | N/A          | 77           | M   | W    | 2           | Y       | Y       | 9.1 | Aortic dissection / Multiple system failure |
|        | CEREBELLUM | Y      |      |              |              |     |      |             | Y       | 7.3     |     |                                             |
|        | FRONTAL    |        |      |              |              |     |      |             | Y       | N/A     |     |                                             |
| UCSD   | 43         | MOTOR  | ALS  | 72.25        | 74           | M   | W    | 6           | Y       |         | 4.7 |                                             |
|        | CEREBELLUM | Y      |      |              |              |     |      |             | Y       | 6.3     |     |                                             |
| JHU    | 44         | MOTOR  | CTRL | N/A          | 90           | F   | W    | 9           | Y       |         | 3.4 | Polio                                       |
|        | OCCIPITAL  | Y      |      |              |              |     |      |             |         | 2.9     |     |                                             |
| UCSD   | 45         | MOTOR  | ALS  | 64           | 69           | F   | W    | 5           | Y       | Y       | 9.1 |                                             |
|        | CEREBELLUM | Y      |      |              |              |     |      |             | Y       | 7.9     |     |                                             |
| UCSD   | 48         | MOTOR  | ALS  | 65.2         | 67           | M   | W    | 6           | Y       | Y       | 10  |                                             |
|        | CEREBELLUM | Y      |      |              |              |     |      |             | Y       | 7.4     |     |                                             |
| JHU    | 49         | MOTOR  | ALS  | 62           | 68           | F   | W    | 4           | Y       |         | 7.9 |                                             |
|        | OCCIPITAL  | Y      |      |              |              |     |      |             |         | 7.5     |     |                                             |
|        | HIPPO      | Y      |      |              |              |     |      |             |         | 2.7     |     |                                             |
|        | FRONTAL    |        |      |              |              |     |      |             | Y       | N/A     |     |                                             |
| JHU    | 60         | MOTOR  | CTRL | N/A          | 80           | M   | W    | 15          | Y       | Y       | 6.8 | Lewy body dementia / Peripheral neuropathy  |
|        | OCCIPITAL  | Y      |      |              |              |     |      |             |         | 4.5     |     |                                             |
| UCSD   | 60         | MOTOR  | ALS  | 55           | 58           | F   | W    | 3           | Y       |         | 10  |                                             |
|        | CEREBELLUM | Y      |      |              |              |     |      |             | Y       | 7.8     |     |                                             |
| JHU    | 61         | MOTOR  | ALS  | 71           | 72           | F   | W    | 12          | Y       |         | N/A |                                             |
|        | OCCIPITAL  | Y      |      |              |              |     |      |             |         | 4.2     |     |                                             |
|        | HIPPO      | Y      |      |              |              |     |      |             |         | 5.4     |     |                                             |
|        | FRONTAL    |        |      |              |              |     |      |             | Y       | N/A     |     |                                             |
| UCSD   | 62         | MOTOR  | ALS  | 50.3         | 52           | M   | W    | 6           | Y       | Y       | 10  |                                             |
|        | CEREBELLUM | Y      |      |              |              |     |      |             | Y       | 6.9     |     |                                             |
| UCSD   | 64         | MOTOR  | ALS  | 44           | 47           | M   | W    | 6.5         |         | Y       | 9.9 |                                             |
|        | CEREBELLUM |        |      |              |              |     |      |             | Y       | N/A     |     |                                             |
| JHU    | 70         | MOTOR  | ALS  |              | 63           | M   | W    | 6           | Y       |         | 5.2 | OPTN M98K                                   |
|        | OCCIPITAL  | Y      |      |              |              |     |      |             |         | 5.6     |     |                                             |
|        | HIPPO      | Y      |      |              |              |     |      |             |         | 6.9     |     |                                             |
| UCSD   | 73         | MOTOR  | CTRL | N/A          | 74           | M   | W    | 5.5         | Y       |         | 10  | Cardiovascular failure                      |
|        | CEREBELLUM | Y      |      |              |              |     |      |             |         | 2.9     |     |                                             |
|        | FRONTAL    |        |      |              |              |     |      |             | Y       | N/A     |     |                                             |
| JHU    | 74         | MOTOR  | ALS  | 46           | 47           | M   | W    | 18.5        | Y       | Y       | 6   | SOD1 A4V                                    |
|        | OCCIPITAL  | Y      |      |              |              |     |      |             |         | 3.7     |     |                                             |
| JHU    | 82         | MOTOR  | ALS  | 63           | 66           | M   | W    | 13          | Y       |         | 5.2 |                                             |
|        | OCCIPITAL  | Y      |      |              |              |     |      |             |         | 7       |     |                                             |
|        | HIPPO      | Y      |      |              |              |     |      |             | Y       | 6.2     |     |                                             |
|        | FRONTAL    | Y      |      |              |              |     |      |             | Y       | N/A     |     |                                             |

|      |            |            |      |     |       |   |    |      |   |   |     |                                                      |  |
|------|------------|------------|------|-----|-------|---|----|------|---|---|-----|------------------------------------------------------|--|
| JHU  | 83         | MOTOR      | ALS  | 44  | 50    | M | B  | 4.5  | Y | Y | 8.5 | SOD1 N139K                                           |  |
|      |            | OCCIPITAL  |      |     |       |   |    |      |   | Y |     | 7.6                                                  |  |
| JHU  | 88         | MOTOR      | ALS  | 57  | 59    | M | W  | 10   | Y |   | 3.5 | FTD+fALS / C9orf72+                                  |  |
|      |            | OCCIPITAL  |      |     |       |   |    |      |   | Y |     | 2.1                                                  |  |
| JHU  | 89         | MOTOR      | ALS  | 69  | 71    | F | W  | 19.5 | Y |   | 5.8 |                                                      |  |
|      |            | OCCIPITAL  |      |     |       |   |    |      |   | Y |     | 4.3                                                  |  |
|      |            | HIPPO      |      |     |       |   |    |      |   | Y | Y   | 4.3                                                  |  |
| JHU  | 90         | MOTOR      | ALS  | 57  | 59    | F | W  | 10   | Y | Y | 6.6 |                                                      |  |
|      |            | OCCIPITAL  |      |     |       |   |    |      |   | Y |     | 7.1                                                  |  |
| JHU  | 91         | MOTOR      | ALS  | 50  | 53    | M | W  | ?    | Y | Y | 7.9 |                                                      |  |
|      |            | OCCIPITAL  |      |     |       |   |    |      | Y |   | 7.6 |                                                      |  |
| JHU  | 92         | MOTOR      | ALS  | 70  | 92    | M | W  | 9.5  | Y | Y | 6.6 | C9orf72+                                             |  |
|      |            | OCCIPITAL  |      |     |       |   |    |      |   | Y |     | 4.5                                                  |  |
| GBB  | 13-06/ 93  | MOTOR      | CTRL |     | 72    | M | W  | 7    | Y |   | 6.6 | Diffuse alveolar damage / Pneumonia                  |  |
|      |            | OCCIPITAL  |      |     |       |   |    |      |   | Y |     | 6.3                                                  |  |
| GBB  | 14-06      | MOTOR      | CTRL |     | 71    | F | na | 5    | Y |   | 4.3 | Hypertensive vasculopathy, Lacunar infarcts          |  |
|      |            | OCCIPITAL  |      |     |       |   |    |      |   | Y |     | N/A                                                  |  |
| GBB  | 15-09/ 101 | MOTOR      | CTRL |     | 70    | F | na | 32   | Y |   | 9.9 | Indeterminate                                        |  |
|      |            | OCCIPITAL  |      |     |       |   |    |      |   | Y |     | N/A                                                  |  |
| UCSD | 103        | MOTOR      | CTRL | N/A | 92    | F | W  | 10   | Y |   | 9.6 | Coronary artery disease / Congestive heart failure   |  |
|      |            | CEREBELLUM |      |     |       |   |    |      |   | Y |     | 5                                                    |  |
| MTB  | 145        | TSC        | CTRL |     | 48.66 | M | W  | 21   | Y |   | 5.3 | Hypertensive arteriosclerotic cardiovascular disease |  |
| MTB  | 357        | CSC        | ALS  |     | 56.01 | F | W  | 21   | Y |   | 8   |                                                      |  |
| MTB  | 802        | CSC        | ALS  |     | 73.63 | F | W  | 20   |   | Y | 8.3 |                                                      |  |
| MTB  | 884        | CSC        | ALS  |     | 88.40 | M | W  | 24   | Y |   | 6.6 |                                                      |  |
| MTB  | 1100       | CSC        | ALS  |     | 57.19 | F | W  | 14   | Y | Y | 6.4 |                                                      |  |
| MTB  | 1131       | TSC        | CTRL |     | 55.06 | M | W  | 8    | Y | Y | 8.1 | Arteriosclerotic cardiovascular disease              |  |
| MTB  | 1228       | TSC        | CTRL |     | 47.35 | M | W  | 13   | Y | Y | N/A | Arteriosclerotic cardiovascular disease              |  |
| MTB  | 1515       | CSC        | ALS  |     | 56.05 | F | W  | 6    | Y | Y | 2.9 |                                                      |  |
| MTB  | 4263       | CSC        | CTRL |     | 61.51 | M | W  | 6    | Y |   | 7.8 | Cardiac arrest                                       |  |
| MTB  | 4762       | CSC        | ALS  |     | 59.65 | M | W  | 6    | Y | Y | 2.9 |                                                      |  |
| MTB  | 4768       | CSC        | ALS  |     | 45.97 | M | W  | 19   |   | Y | N/A |                                                      |  |
| MTB  | 4837       | CSC        | ALS  |     | 45.97 | F | W  | 12   |   | Y | N/A |                                                      |  |
| MTB  | 4857       | CSC        | ALS  |     | 78.33 | F | W  | 19   | Y |   | 8.7 |                                                      |  |
| MTB  | 5004       | CSC        | ALS  |     | 62.60 | F | W  | 22   | Y |   | 7.7 |                                                      |  |
| MTB  | 5148       | CSC        | ALS  |     | 62.62 | F | W  | 9    | Y |   | 2.7 |                                                      |  |
| MTB  | 5358       | TSC        | CTRL |     | 54.58 | F | W  | 24   | Y |   | 6   | Hypertensive cardiovascular disease                  |  |
| MTB  | 5383       | CSC        | ALS  |     | 60.33 | F | W  | 21   | Y | Y | 6.6 |                                                      |  |
| MTB  | 5388       | CSC        | ALS  |     | 61.13 | M | W  | 8    | Y | Y | 3.9 |                                                      |  |
| MTB  | 5450       | CSC        | CTRL |     | 48.82 | M | B  | 6    | Y | Y | 4.1 | Congestive heart failure                             |  |
| MTB  | 5451       | CSC        | CTRL |     | 57.28 | F | B  | 20   |   | Y | N/A |                                                      |  |
| MTB  | 5452       | CSC        | CTRL |     | 67.52 | M | B  | 23   | Y |   | 6.7 | Occlusive pulmonary thromboembolism                  |  |
| MTB  | 5456       | CSC        | CTRL |     | 57.84 | M | W  | 16   | Y |   | 8   | Atherosclerotic cardiovascular disease               |  |
| MTB  | 5458       | CSC        | CTRL |     | 64.15 | M | W  | 13   | Y |   | 7.6 | Multiple Injuries                                    |  |
| MTB  | 5593       | CSC        | ALS  |     | 70.46 | F | W  | 24   | Y | Y | 7   |                                                      |  |
| MTB  | 5595       | CSC        | ALS  |     | 56.12 | M | W  | 16   |   | Y | N/A |                                                      |  |
| MTB  | 5604       | CSC        | CTRL |     | 73.33 | F | W  | 20   | Y |   | 5.6 |                                                      |  |
| MTB  | 5609       | CSC        | CTRL |     | 54.78 | F | W  | 6    | Y |   | 6.1 | Atherosclerotic cardiovascular disease               |  |
| MTB  | 5613       | CSC        | CTRL |     | 72.36 | M | W  | 24   | Y | Y | 6.5 | Torso Injuries and compressional asphyxia            |  |
| MTB  | 5615       | TSC        | CTRL |     | 50.49 | M | W  | 19   |   | Y | N/A | Acute alcohol intoxication                           |  |
| MTB  | 5617       | CSC        | CTRL |     | 59.91 | M | W  | 10   | Y | Y | 4.6 | Multiple Injuries                                    |  |
| MTB  | 5630       | CSC        | CTRL |     | 37.28 | F | B  | 17   | Y |   | 7.1 | Hypertrophic cardiomyopathy with aortic dissection   |  |
| MTB  | 5656       | CSC        | CTRL |     | 51.45 | F | W  | 21   |   | Y | N/A | Atherosclerotic cardiovascular disease               |  |
| MTB  | 5666       | CSC        | CTRL |     | 65.55 | M | W  | 25   | Y |   | 6.2 | Ruptured aortic aneurysm                             |  |
| MTB  | 5675       | CSC        | ALS  |     | 53.76 | M | W  | 4    | Y |   | 7.6 |                                                      |  |
| MTB  | 5678       | CSC        | ALS  |     | 55.68 | M | W  | 6    | Y |   | 5.2 |                                                      |  |
| MTB  | 5711       | CSC        | CTRL |     | 50.50 | F | B  | 15   |   | Y | N/A | Complications of lung cancer                         |  |
| MTB  | 5789       | CSC        | ALS  |     | 71.07 | F | W  | 17   | Y |   | 5.5 |                                                      |  |
| MTB  | 5847       | CSC        | ALS  |     | 53.51 | M | W  | 30   | Y |   | 8.1 |                                                      |  |

GBB: Georgetown Brain Bank

MTB: University of Maryland Brain and Tissue Bank, NIH NeuroBioBank

UCSD: Dept. of Neurosciences, University of California San Diego School of Medicine

JHU: Target ALS Human Multicenter Tissue Core, Johns Hopkins University School of Medicine

CSC / TSC: Cervical / Thoracic Spinal Cord

PMI: Post-mortem interval

RIN: RNA Integrity Number

N/A: not available or Western blot only
